# Supplementary material
Source: publisher site journal article supplement (https://www.dovepress.com/article/480199)
Supplement: Supplementary file 1 [file get_supplementary_file.php]

**Supplemental Content**

**Title: Identifying the genetic associations between diabetes mellitus and the risk of vitiligo**

*Lingyun Zhao,1,2 Meng Hu3, Li Li1,2,3*

**1. Supplemental Figure section**

**Figure S1**. Forest plots for the associations of genetic susceptibility between DM and vitiligo using different Mendelian randomizations (The remaining negative results not shown in the text)

**Figure S2**. Visualization of the MR analysis of the effect of DM and its two subtypes on vitiligo.

**Figure S3**. Visualization of the MR analysis of the effect of vitiligo on DM and its two subtypes.

**2. Supplemental Table section**

**Table S1.** Detailed SNP information for the diabetes mellitus trait in vitiligo from UK Biobank.

**Table S2.** Detailed SNP information for the type 2 diabetes trait in vitiligo from UK Biobank.

**Table S3.** Detailed SNP information for the type 1 diabetes trait in vitiligo from UK Biobank.

**Table S4.** Detailed SNP information for the vitiligo trait in diabetes mellitus from GCST004785.

**Table S5.** Detailed SNP information for the vitiligo trait in type 1 diabetes from GCST004785.

**Table S6.** Detailed SNP information for the vitiligo trait in type 2 diabetes from GCST004785.

**1. Supplemental Figure section**


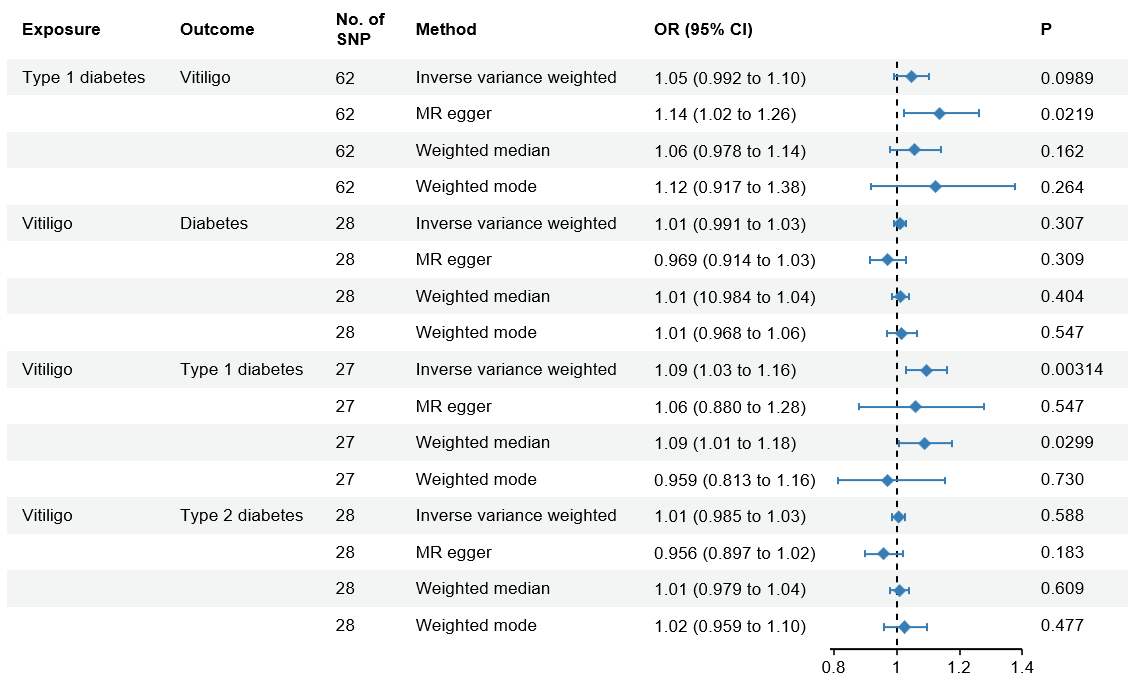


**Figure S1. Forest plots for the associations of genetic susceptibility between DM and vitiligo using different MR. (**The amounts of SNPs of type 1 diabetes are too small to complete the whole analyses as exposure, so we selected SNPs as IVs up to the genome-wide significance threshold (P < 5 × 10−5)). Abbreviations: SNPs, single nucleotide polymorphisms. DM, diabetes mellitus. MR, Mendelian randomization.


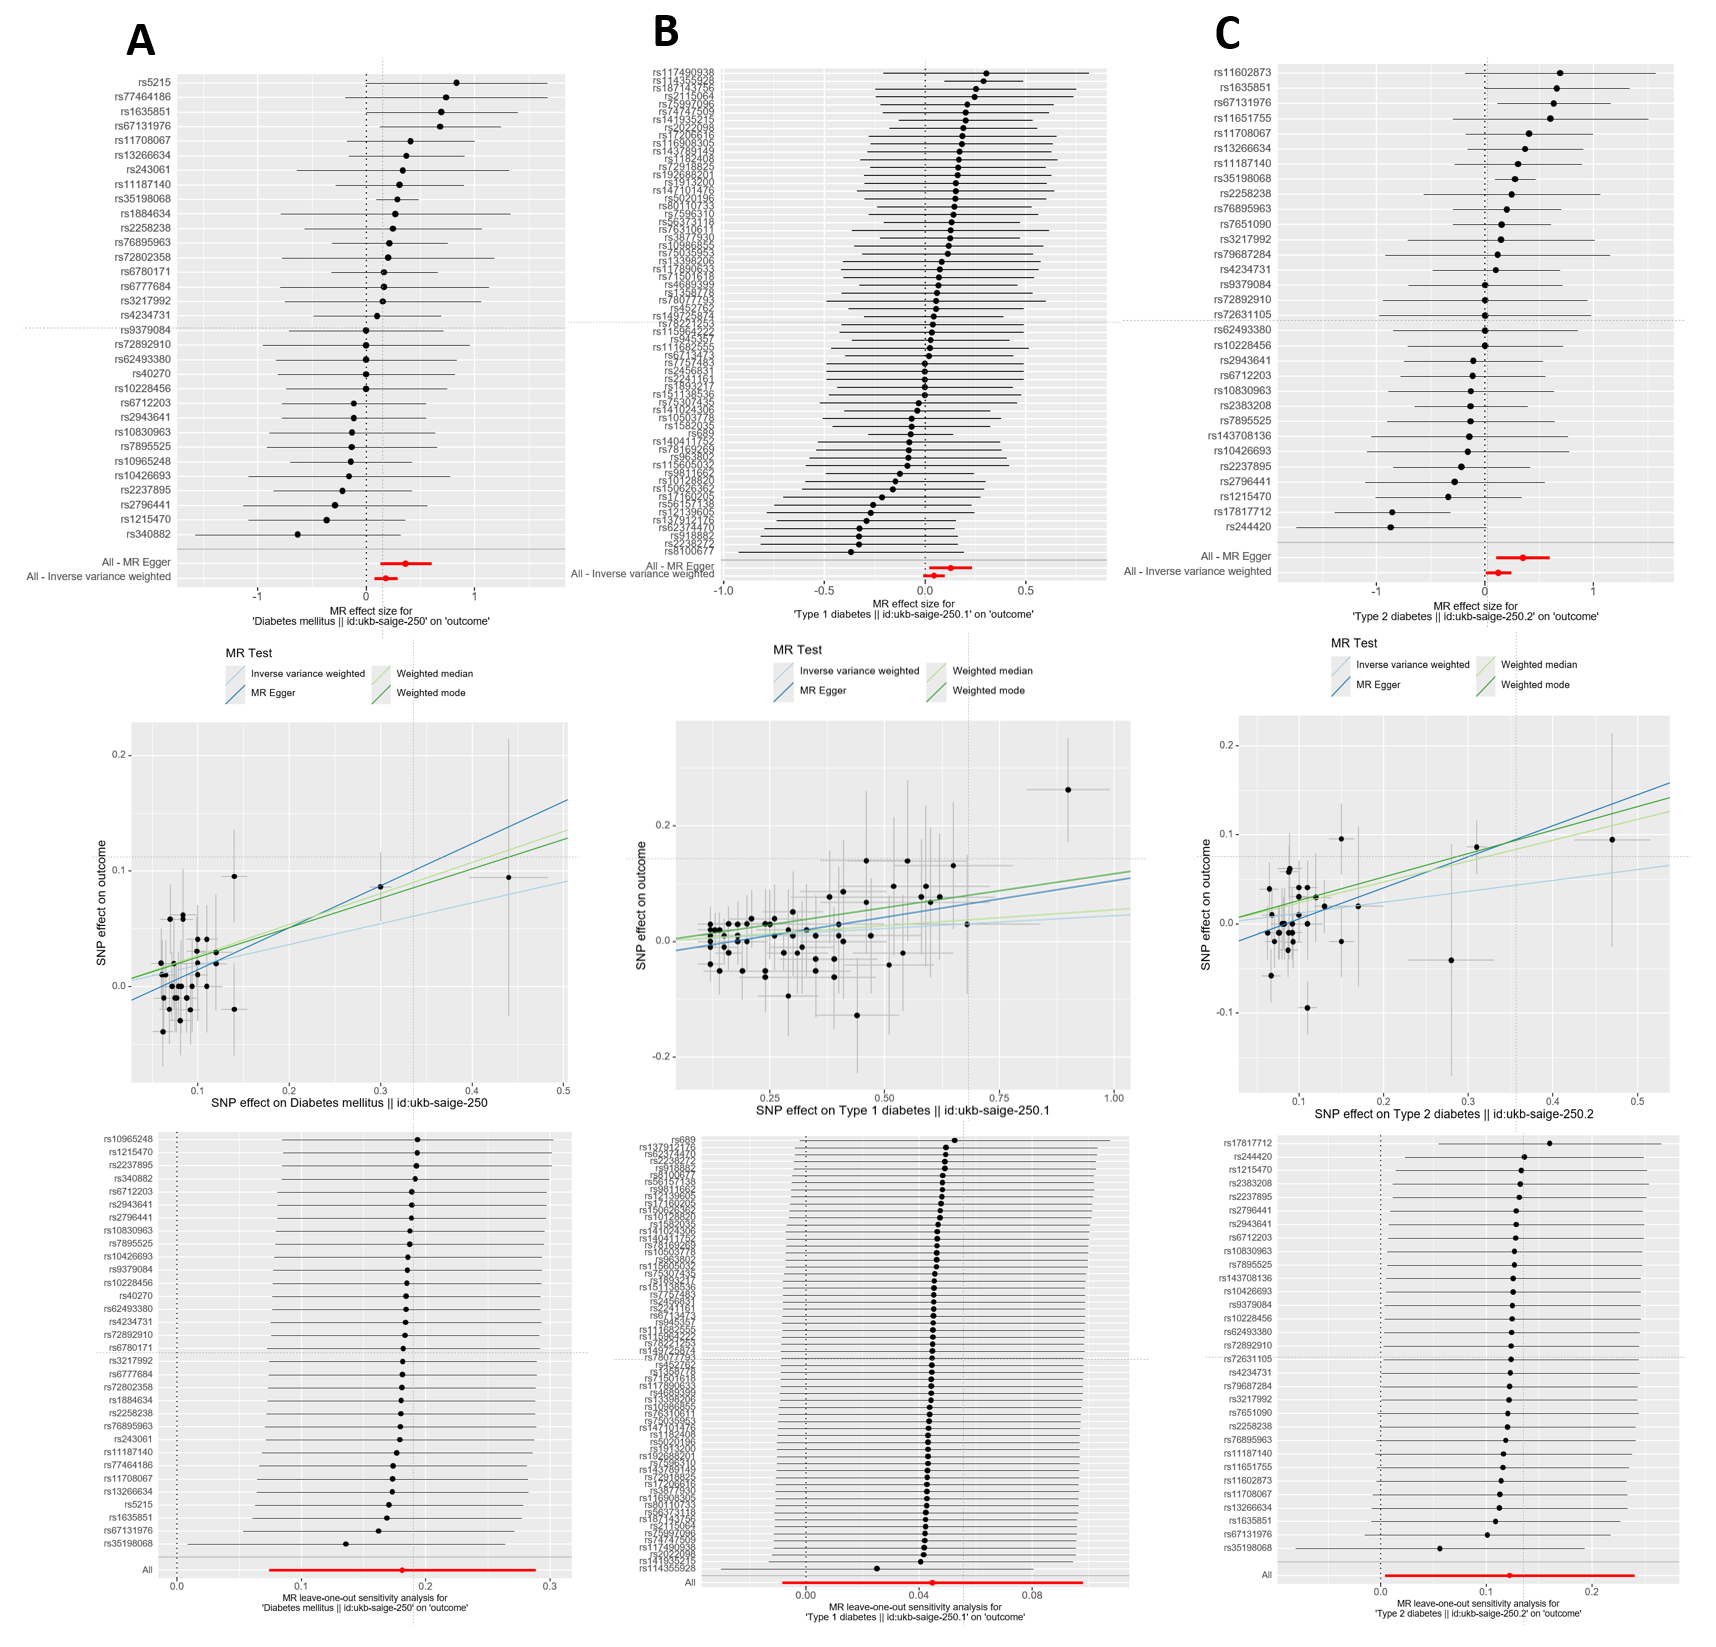


**Figure S2. Visualization of the MR analysis of the effect of DM and its two subtypes on vitiligo.** (A) Scatter plot of the primary MR analysis and leave-one-out sensitivity analysis of the effect of diabetes mellitus on vitiligo; (B) Scatter plot of the primary MR analysis and leave-one-out sensitivity analysis of the effect of type 1 diabetes on vitiligo. (C) Scatter plot of the primary MR analysis and leave-one-out sensitivity analysis of the effect of type 2 diabetes on vitiligo. Abbreviations: MR, Mendelian randomization. DM, diabetes mellitus. SNP, single- nucleotide polymorphism.


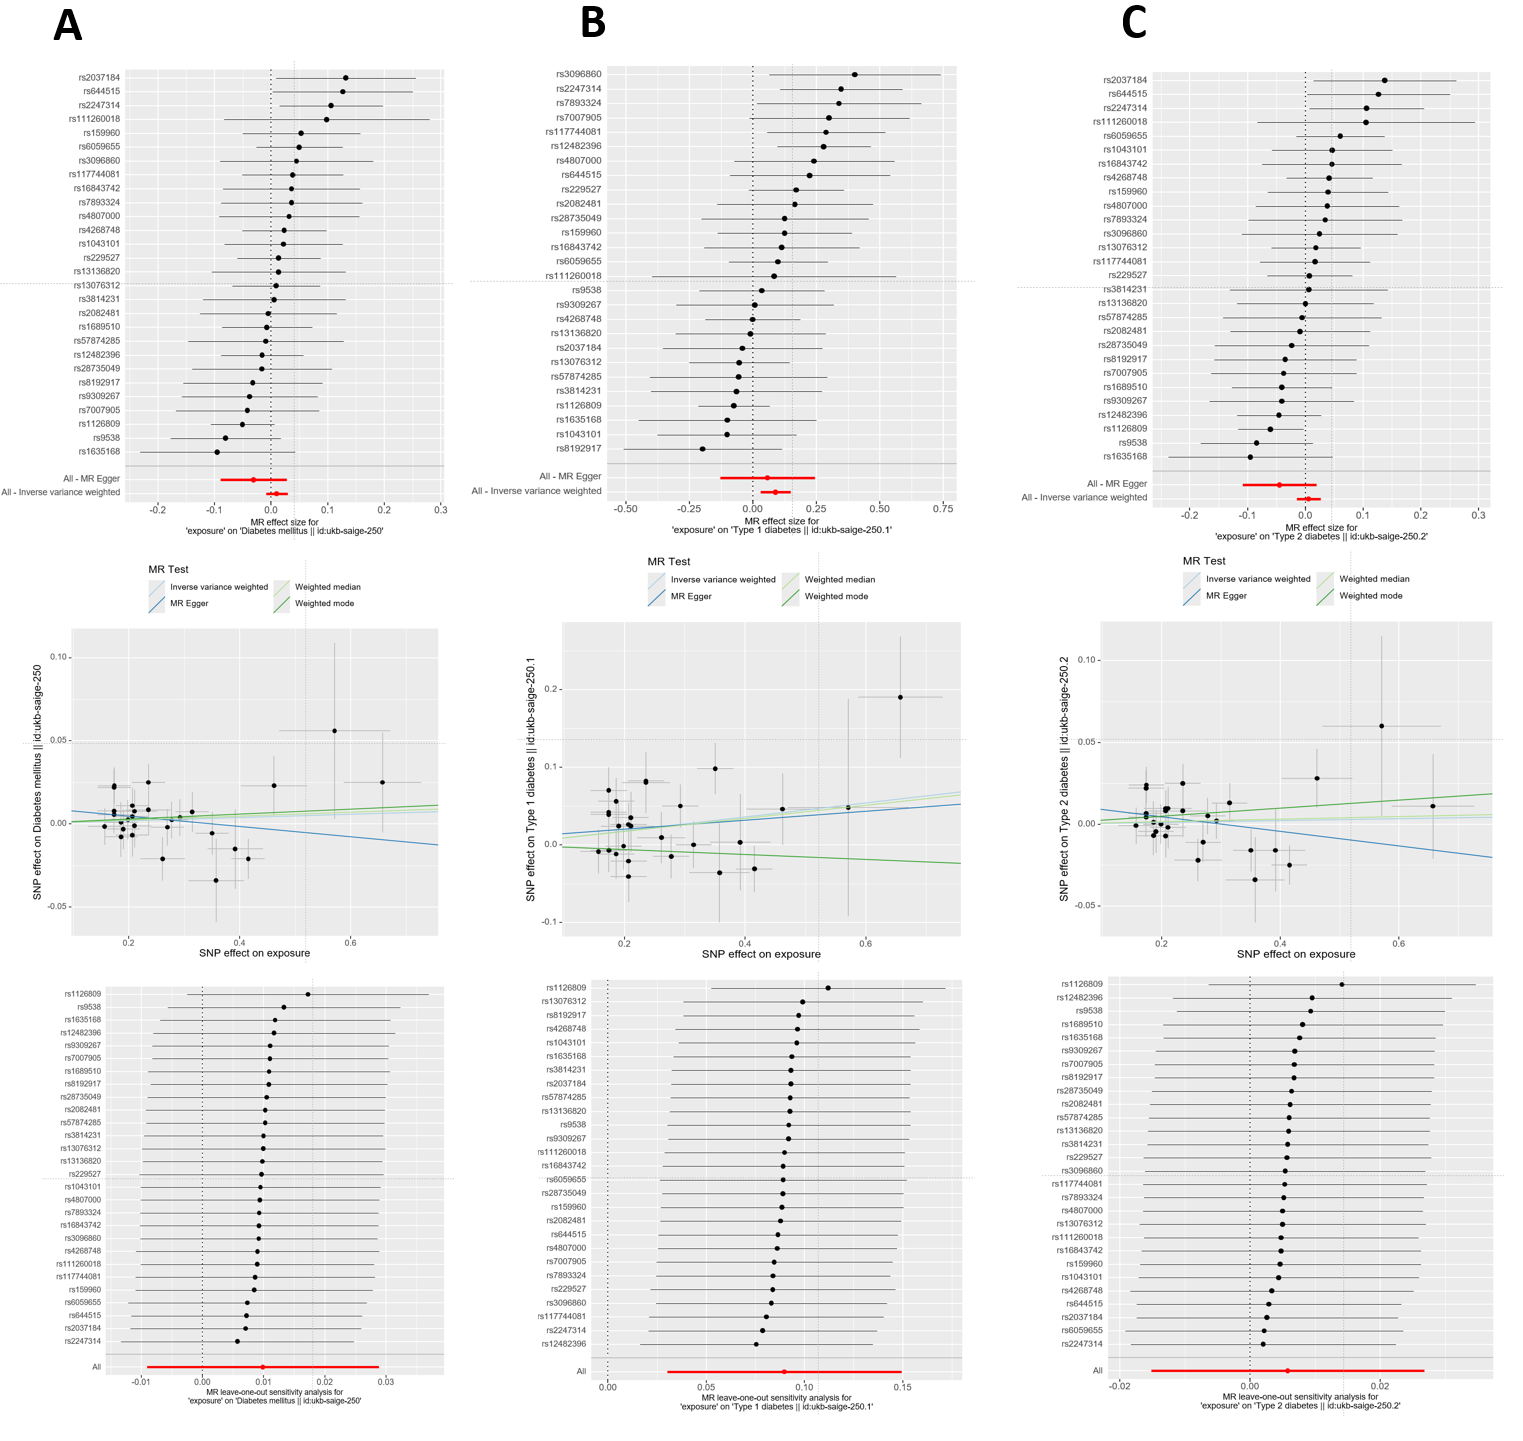


**Figure S3. Visualization of the MR analysis of the effect of vitiligo on DM and its two subtypes.** (A) Scatter plot of the primary MR analysis and leave-one-out sensitivity analysis of the effect of vitiligo on diabetes mellitus; (B) Scatter plot of the primary MR analysis and leave-one-out sensitivity analysis of the effect of vitiligo on type 1 diabetes. (C) Scatter plot of the primary MR analysis and leave-one-out sensitivity analysis of the effect of vitiligo on type 2 diabetes. Abbreviations: MR, Mendelian randomization. DM, diabetes mellitus. SNP, single- nucleotide polymorphism.

**2. Supplemental Table section**

**Table S1. Detailed SNP information for the diabetes mellitus trait in vitiligo from UK Biobank.**

| SNP | Effect allele | Other allele | BETA | SE | EAF | Pval | F | Gene |
| --- | --- | --- | --- | --- | --- | --- | --- | --- |
| rs10228456 | T | C | 0.079 | 0.011 | 0.55 | 4.10E-13 | 1267 | AGMO |
| rs10426693 | C | T | -0.063 | 0.011 | 0.44 | 8.70E-09 | 801 | EML2 |
| rs10830963 | G | C | 0.077 | 0.012 | 0.28 | 1.40E-10 | 980 | MTNR1B |
| rs10965248 | C | T | -0.14 | 0.014 | 0.18 | 1.60E-23 | 2380 | DMRTA1 |
| rs11187140 | A | G | -0.099 | 0.011 | 0.36 | 1.20E-18 | 1855 | Y_RNA,HHEX |
| rs11708067 | G | A | -0.1 | 0.013 | 0.25 | 6.30E-16 | 1539 | ADCY5 |
| rs1215470 | C | T | -0.081 | 0.012 | 0.29 | 1.10E-11 | 1108 | SPRY2 |
| rs13266634 | T | C | -0.11 | 0.012 | 0.31 | 3.10E-20 | 2128 | SLC30A8 |
| rs1635851 | T | C | -0.084 | 0.011 | 0.58 | 1.60E-14 | 1411 | JAZF1 |
| rs1884634 | T | G | 0.074 | 0.013 | 0.21 | 3.40E-08 | 744 | NA |
| rs2237895 | C | A | 0.092 | 0.011 | 0.42 | 2.40E-17 | 1693 | KCNQ1 |
| rs2258238 | T | A | 0.12 | 0.018 | 0.11 | 6.60E-11 | 1156 | HMGA2 |
| rs243061 | C | T | -0.06 | 0.011 | 0.41 | 4.00E-08 | 714 | NA |
| rs2796441 | A | G | -0.069 | 0.011 | 0.42 | 2.30E-10 | 951 | NA |
| rs2943641 | C | T | 0.088 | 0.011 | 0.65 | 6.80E-15 | 1446 | NYAP2 |
| rs3217992 | T | C | 0.065 | 0.011 | 0.37 | 6.00E-09 | 807 | CDKN2B |
| rs340882 | G | C | 0.062 | 0.011 | 0.62 | 2.30E-08 | 742 | PROX1-AS1 |
| rs35198068 | C | T | 0.3 | 0.012 | 0.29 | ＜1E-100 | 15740 | TCF7L2 |
| rs40270 | C | A | 0.072 | 0.013 | 0.77 | 2.20E-08 | 752 | NA |
| rs4234731 | G | A | 0.1 | 0.011 | 0.59 | 1.60E-19 | 1988 | NA |
| rs5215 | T | C | -0.07 | 0.011 | 0.64 | 4.00E-10 | 925 | KCNJ11 |
| rs62493380 | G | A | -0.094 | 0.016 | 0.13 | 8.00E-09 | 819 | NA |
| rs6712203 | T | C | -0.088 | 0.011 | 0.37 | 4.30E-15 | 1482 | COBLL1 |
| rs67131976 | T | C | 0.14 | 0.014 | 0.17 | 1.60E-22 | 2275 | CDKAL1 |
| rs6777684 | G | A | 0.061 | 0.011 | 0.61 | 3.70E-08 | 725 | NA |
| rs6780171 | A | T | 0.12 | 0.012 | 0.31 | 6.20E-26 | 2535 | IGF2BP2 |
| rs72802358 | C | G | -0.1 | 0.018 | 0.1 | 4.70E-09 | 737 | CTRB1 CTRB2 |
| rs72892910 | T | G | 0.082 | 0.014 | 0.17 | 1.00E-08 | 777 | TFAP2B |
| rs76895963 | G | T | -0.44 | 0.043 | 0.021 | 1.20E-23 | 3282 | CCND2 |
| rs77464186 | C | A | -0.084 | 0.015 | 0.16 | 1.20E-08 | 777 | ARAP1 |
| rs7895525 | C | T | 0.075 | 0.013 | 0.24 | 2.80E-09 | 841 | CDC123 |
| rs9379084 | A | G | -0.11 | 0.017 | 0.12 | 3.30E-10 | 1048 | RREB1 |

**Table S2. Detailed SNP information for the type 2 diabetes trait in vitiligo from UK Biobank.**

| SNP | Effect allele | Other_  allele | BETA | SE | EAF | Pval | F | Gene |
| --- | --- | --- | --- | --- | --- | --- | --- | --- |
| rs10228456 | T | C | 0.082 | 0.011 | 0.55 | 3.20E-13 | 1362 | AGMO |
| rs10426693 | C | T | -0.063 | 0.011 | 0.44 | 1.90E-08 | 799 | EML2 |
| rs10830963 | G | C | 0.077 | 0.012 | 0.28 | 7.00E-10 | 977 | MTNR1B |
| rs11187140 | A | G | -0.1 | 0.012 | 0.36 | 6.60E-19 | 1887 | Y_RNA,HHEX |
| rs11602873 | T | A | -0.089 | 0.015 | 0.16 | 5.40E-09 | 870 | ARAP1 |
| rs11651755 | T | C | -0.065 | 0.011 | 0.51 | 6.90E-09 | 863 | HNF1B |
| rs11708067 | G | A | -0.1 | 0.013 | 0.25 | 3.80E-16 | 1535 | ADCY5 |
| rs1215470 | C | T | -0.087 | 0.012 | 0.29 | 1.40E-12 | 1275 | SPRY2 |
| rs13266634 | T | C | -0.11 | 0.012 | 0.31 | 9.10E-20 | 2121 | SLC30A8 |
| rs143708136 | T | C | 0.28 | 0.051 | 0.013 | 2.30E-08 | 822 | SNX29 |
| rs1635851 | T | C | -0.088 | 0.011 | 0.58 | 6.10E-15 | 1544 | JAZF1 |
| rs17817712 | G | A | 0.11 | 0.011 | 0.39 | 9.60E-21 | 2361 | FTO |
| rs2237895 | C | A | 0.093 | 0.011 | 0.42 | 1.60E-16 | 1725 | KCNQ1 |
| rs2258238 | T | A | 0.12 | 0.018 | 0.11 | 1.90E-10 | 1153 | HMGA2 |
| rs2383208 | G | A | -0.15 | 0.015 | 0.18 | 4.40E-24 | 2726 | DMRTA1 |
| rs244420 | G | T | -0.067 | 0.011 | 0.41 | 2.60E-09 | 887 | NFAT5 |
| rs2796441 | A | G | -0.071 | 0.011 | 0.42 | 3.00E-10 | 1004 | NA |
| rs2943641 | C | T | 0.092 | 0.012 | 0.65 | 3.40E-15 | 1576 | NYAP2 |
| rs3217992 | T | C | 0.068 | 0.012 | 0.37 | 4.50E-09 | 881 | CDKN2B |
| rs35198068 | C | T | 0.31 | 0.012 | 0.29 | ＜1E-100 | 16799 | TCF7L2 |
| rs4234731 | G | A | 0.1 | 0.011 | 0.59 | 4.30E-19 | 1982 | NA |
| rs62493380 | G | A | -0.092 | 0.017 | 0.13 | 4.70E-08 | 782 | NA |
| rs6712203 | T | C | -0.088 | 0.012 | 0.37 | 2.90E-14 | 1477 | COBLL1 |
| rs67131976 | T | C | 0.15 | 0.015 | 0.17 | 7.00E-25 | 2605 | CDKAL1 |
| rs72631105 | A | G | 0.08 | 0.014 | 0.18 | 2.30E-08 | 772 | NA |
| rs72892910 | T | G | 0.083 | 0.015 | 0.17 | 1.90E-08 | 794 | TFAP2B |
| rs7651090 | G | A | 0.13 | 0.012 | 0.31 | 6.00E-28 | 2969 | IGF2BP2 |
| rs76895963 | G | T | -0.47 | 0.045 | 0.021 | 3.90E-25 | 3737 | CCND2 |
| rs7895525 | C | T | 0.076 | 0.013 | 0.24 | 6.20E-09 | 861 | CDC123 |
| rs79687284 | C | G | 0.17 | 0.03 | 0.035 | 2.10E-08 | 797 | NA |
| rs9379084 | A | G | -0.11 | 0.018 | 0.12 | 1.40E-09 | 1045 | RREB1 |

**Table S3. Detailed SNP information for the type 1 diabetes trait in vitiligo from UK Biobank.**

| SNP | Effect allele | Other allele | BETA | EAF | SE | Pval | F |
| --- | --- | --- | --- | --- | --- | --- | --- |
| rs10128820 | T | C | 0.35 | 0.035 | 0.077 | 6.40E-06 | 3266 |
| rs10503778 | G | A | 0.31 | 0.047 | 0.067 | 4.40E-06 | 3399 |
| rs10986855 | A | G | 0.25 | 0.067 | 0.056 | 1.20E-05 | 3083 |
| rs111682555 | C | T | 0.4 | 0.022 | 0.096 | 3.60E-05 | 2714 |
| rs114355928 | T | G | 0.9 | 0.029 | 0.091 | 5.10E-23 | 18709 |
| rs115605032 | T | C | 0.35 | 0.032 | 0.08 | 1.20E-05 | 2993 |
| rs115964222 | C | T | 0.3 | 0.04 | 0.072 | 3.10E-05 | 2724 |
| rs116908305 | A | G | 0.52 | 0.014 | 0.12 | 2.10E-05 | 2944 |
| rs117490938 | T | C | 0.46 | 0.022 | 0.1 | 7.00E-06 | 3597 |
| rs117890633 | C | T | 0.4 | 0.021 | 0.099 | 4.80E-05 | 2592 |
| rs1182408 | T | C | 0.12 | 0.49 | 0.028 | 9.00E-06 | 2837 |
| rs12139605 | C | G | 0.19 | 0.11 | 0.045 | 3.30E-05 | 2786 |
| rs13398206 | C | T | 0.12 | 0.31 | 0.03 | 3.80E-05 | 2426 |
| rs1358778 | T | C | 0.33 | 0.035 | 0.077 | 2.30E-05 | 2901 |
| rs137912176 | A | G | 0.44 | 0.026 | 0.092 | 1.50E-06 | 3876 |
| rs140411752 | G | A | 0.39 | 0.025 | 0.095 | 5.00E-05 | 2924 |
| rs141024306 | C | T | 0.54 | 0.017 | 0.11 | 1.50E-06 | 3852 |
| rs141935215 | A | G | 0.65 | 0.014 | 0.13 | 6.80E-07 | 4619 |
| rs143789149 | A | G | -0.3 | 0.05 | 0.066 | 4.90E-06 | 3375 |
| rs147101476 | A | G | -0.2 | 0.1 | 0.046 | 8.40E-06 | 2839 |
| rs149725874 | A | G | 0.68 | 0.0094 | 0.16 | 2.80E-05 | 3400 |
| rs150626362 | T | C | 0.39 | 0.025 | 0.091 | 1.70E-05 | 2924 |
| rs151138536 | A | G | 0.41 | 0.025 | 0.095 | 1.20E-05 | 3234 |
| rs1582035 | C | A | -0.15 | 0.35 | 0.029 | 1.90E-07 | 4049 |
| rs17160205 | A | G | 0.24 | 0.06 | 0.059 | 3.20E-05 | 2560 |
| rs17206616 | C | G | 0.21 | 0.09 | 0.049 | 1.50E-05 | 2848 |
| rs187143756 | A | G | -0.55 | 0.013 | 0.13 | 4.00E-05 | 3062 |
| rs1893217 | G | A | 0.18 | 0.17 | 0.037 | 1.70E-06 | 3612 |
| rs1913200 | G | A | -0.13 | 0.54 | 0.028 | 6.70E-06 | 3314 |
| rs192688201 | A | T | 0.59 | 0.012 | 0.14 | 2.10E-05 | 3258 |
| rs2022098 | C | A | -0.16 | 0.25 | 0.032 | 7.30E-07 | 3794 |
| rs2115064 | A | G | -0.12 | 0.57 | 0.028 | 2.60E-05 | 2783 |
| rs2238272 | T | G | 0.12 | 0.51 | 0.028 | 1.60E-05 | 2837 |
| rs2241161 | A | C | -0.12 | 0.41 | 0.028 | 3.30E-05 | 2746 |
| rs2456831 | G | A | 0.2 | 0.89 | 0.045 | 6.70E-06 | 3090 |
| rs3877930 | G | A | 0.62 | 0.014 | 0.12 | 6.40E-07 | 4198 |
| rs452762 | C | T | 0.18 | 0.13 | 0.042 | 1.50E-05 | 2890 |
| rs4689399 | T | C | 0.15 | 0.52 | 0.028 | 1.10E-07 | 4446 |
| rs5020196 | A | C | 0.26 | 0.055 | 0.061 | 1.80E-05 | 2770 |
| rs56157138 | T | C | 0.24 | 0.061 | 0.058 | 2.90E-05 | 2600 |
| rs56373118 | C | T | 0.58 | 0.011 | 0.14 | 4.70E-05 | 2886 |
| rs62374470 | T | C | 0.29 | 0.049 | 0.066 | 9.90E-06 | 3092 |
| rs6713473 | G | A | 0.47 | 0.017 | 0.11 | 2.40E-05 | 2911 |
| rs689 | T | A | 0.28 | 0.71 | 0.031 | 8.10E-20 | 13058 |
| rs71501618 | A | G | 0.29 | 0.042 | 0.07 | 3.00E-05 | 2667 |
| rs72918825 | C | A | 0.18 | 0.12 | 0.043 | 1.50E-05 | 2697 |
| rs74747509 | T | C | 0.38 | 0.029 | 0.084 | 5.10E-06 | 3209 |
| rs75035953 | C | T | 0.6 | 0.013 | 0.13 | 5.30E-06 | 3650 |
| rs75307435 | G | T | 0.32 | 0.042 | 0.071 | 8.70E-06 | 3252 |
| rs7596310 | T | C | 0.14 | 0.23 | 0.033 | 1.90E-05 | 2736 |
| rs75997096 | C | T | 0.41 | 0.024 | 0.094 | 1.30E-05 | 3107 |
| rs76310611 | A | C | -0.24 | 0.065 | 0.057 | 3.00E-05 | 2760 |
| rs7757483 | A | G | 0.12 | 0.49 | 0.028 | 2.80E-05 | 2837 |
| rs78077793 | G | A | 0.18 | 0.14 | 0.04 | 7.20E-06 | 3078 |
| rs78169269 | A | G | 0.51 | 0.023 | 0.097 | 2.10E-07 | 4630 |
| rs78221253 | T | G | 0.26 | 0.055 | 0.062 | 3.80E-05 | 2770 |
| rs80110733 | C | T | 0.46 | 0.02 | 0.1 | 6.00E-06 | 3274 |
| rs8100677 | C | T | -0.14 | 0.8 | 0.035 | 4.30E-05 | 2470 |
| rs918882 | T | C | -0.12 | 0.47 | 0.028 | 4.20E-05 | 2828 |
| rs945357 | G | A | 0.35 | 0.032 | 0.082 | 2.10E-05 | 2993 |
| rs963802 | C | T | -0.12 | 0.39 | 0.029 | 1.50E-05 | 2700 |
| rs9811662 | A | G | -0.16 | 0.3 | 0.03 | 1.30E-07 | 4254 |

**Table S4. Detailed SNP information for the vitiligo trait in diabetes mellitus from GCST004785.**

| SNP | Effect allele | Other allele | BETA | EAF | Pval | SE | F |
| --- | --- | --- | --- | --- | --- | --- | --- |
| rs1043101 | G | A | 0.207014 | 0.4 | 2.54E-13 | 0.03 | 930 |
| rs111260018 | A | G | 0.57098 | 0.01 | 9.67E-09 | 0.1 | 288 |
| rs1126809 | A | G | -0.41552 | 0.27 | 5.02E-32 | 0.03 | 3233 |
| rs117744081 | G | A | 0.65752 | 0.03 | 1.62E-21 | 0.07 | 1143 |
| rs12482396 | T | A | 0.350657 | 0.22 | 8.12E-29 | 0.03 | 1950 |
| rs13076312 | T | C | 0.277632 | 0.46 | 4.63E-22 | 0.03 | 1762 |
| rs13136820 | C | T | 0.198851 | 0.33 | 1.72E-11 | 0.03 | 788 |
| rs159960 | A | G | 0.207014 | 0.48 | 8.08E-13 | 0.03 | 968 |
| rs1635168 | A | C | 0.357674 | 0.07 | 6.97E-13 | 0.05 | 750 |
| rs16843742 | C | T | -0.21072 | 0.23 | 6.11E-09 | 0.04 | 707 |
| rs1689510 | C | G | 0.270027 | 0.33 | 5.68E-20 | 0.03 | 1475 |
| rs2037184 | C | T | -0.17435 | 0.43 | 4.24E-09 | 0.03 | 670 |
| rs2082481 | A | G | -0.21072 | 0.24 | 3.27E-09 | 0.03 | 729 |
| rs2247314 | C | T | -0.23572 | 0.33 | 1.30E-13 | 0.03 | 1115 |
| rs229527 | A | C | 0.29267 | 0.43 | 1.40E-24 | 0.03 | 1940 |
| rs28735049 | A | T | 0.19062 | 0.26 | 7.45E-10 | 0.03 | 628 |
| rs3096860 | C | T | 0.173953 | 0.32 | 1.02E-08 | 0.03 | 591 |
| rs3814231 | T | C | -0.18633 | 0.26 | 1.71E-08 | 0.03 | 599 |
| rs4268748 | C | T | -0.31471 | 0.27 | 1.23E-20 | 0.03 | 1798 |
| rs4807000 | A | G | 0.173953 | 0.39 | 1.58E-09 | 0.03 | 647 |
| rs57874285 | A | C | 0.157004 | 0.4 | 4.56E-08 | 0.03 | 530 |
| rs6059655 | A | G | -0.46204 | 0.08 | 3.58E-13 | 0.06 | 1436 |
| rs644515 | A | G | 0.173953 | 0.41 | 1.15E-09 | 0.03 | 658 |
| rs7007905 | G | C | -0.18633 | 0.29 | 7.28E-09 | 0.03 | 642 |
| rs7893324 | C | T | -0.23572 | 0.14 | 4.61E-08 | 0.04 | 600 |
| rs8192917 | C | T | 0.207014 | 0.24 | 1.37E-10 | 0.03 | 703 |
| rs9309267 | T | C | 0.392042 | 0.05 | 5.46E-13 | 0.05 | 656 |
| rs9538 | T | G | -0.26136 | 0.22 | 7.81E-13 | 0.04 | 1063 |

**Table S5. Detailed SNP information for the vitiligo trait in type 1 diabetes from GCST004785.**

| SNP | Effect allele | Other allele | BETA | EAF | Pval | SE | F |
| --- | --- | --- | --- | --- | --- | --- | --- |
| rs1043101 | G | A | 0.207014 | 0.4 | 2.54E-13 | 0.03 | 930 |
| rs111260018 | A | G | 0.57098 | 0.01 | 9.67E-09 | 0.1 | 288 |
| rs1126809 | A | G | -0.41552 | 0.27 | 5.02E-32 | 0.03 | 3233 |
| rs117744081 | G | A | 0.65752 | 0.03 | 1.62E-21 | 0.07 | 1143 |
| rs12482396 | T | A | 0.350657 | 0.22 | 8.12E-29 | 0.03 | 1950 |
| rs13076312 | T | C | 0.277632 | 0.46 | 4.63E-22 | 0.03 | 1762 |
| rs13136820 | C | T | 0.198851 | 0.33 | 1.72E-11 | 0.03 | 788 |
| rs159960 | A | G | 0.207014 | 0.48 | 8.08E-13 | 0.03 | 968 |
| rs1635168 | A | C | 0.357674 | 0.07 | 6.97E-13 | 0.05 | 750 |
| rs16843742 | C | T | -0.21072 | 0.23 | 6.11E-09 | 0.04 | 707 |
| rs2037184 | C | T | -0.17435 | 0.43 | 4.24E-09 | 0.03 | 670 |
| rs2082481 | A | G | -0.21072 | 0.24 | 3.27E-09 | 0.03 | 729 |
| rs2247314 | C | T | -0.23572 | 0.33 | 1.30E-13 | 0.03 | 1115 |
| rs229527 | A | C | 0.29267 | 0.43 | 1.40E-24 | 0.03 | 1940 |
| rs28735049 | A | T | 0.19062 | 0.26 | 7.45E-10 | 0.03 | 628 |
| rs3096860 | C | T | 0.173953 | 0.32 | 1.02E-08 | 0.03 | 591 |
| rs3814231 | T | C | -0.18633 | 0.26 | 1.71E-08 | 0.03 | 599 |
| rs4268748 | C | T | -0.31471 | 0.27 | 1.23E-20 | 0.03 | 1798 |
| rs4807000 | A | G | 0.173953 | 0.39 | 1.58E-09 | 0.03 | 647 |
| rs57874285 | A | C | 0.157004 | 0.4 | 4.56E-08 | 0.03 | 530 |
| rs6059655 | A | G | -0.46204 | 0.08 | 3.58E-13 | 0.06 | 1436 |
| rs644515 | A | G | 0.173953 | 0.41 | 1.15E-09 | 0.03 | 658 |
| rs7007905 | G | C | -0.18633 | 0.29 | 7.28E-09 | 0.03 | 642 |
| rs7893324 | C | T | -0.23572 | 0.14 | 4.61E-08 | 0.04 | 600 |
| rs8192917 | C | T | 0.207014 | 0.24 | 1.37E-10 | 0.03 | 703 |
| rs9309267 | T | C | 0.392042 | 0.05 | 5.46E-13 | 0.05 | 656 |
| rs9538 | T | G | -0.26136 | 0.22 | 7.81E-13 | 0.04 | 1063 |

**Table S6. Detailed SNP information for the vitiligo trait in type 2 diabetes from GCST004785.**

| SNP | Effect allele | Other allele | BETA | EAF | Pval | SE | F |
| --- | --- | --- | --- | --- | --- | --- | --- |
| rs1043101 | G | A | 0.207014 | 0.4 | 2.54E-13 | 0.03 | 930 |
| rs111260018 | A | G | 0.57098 | 0.01 | 9.67E-09 | 0.1 | 288 |
| rs1126809 | A | G | -0.41552 | 0.27 | 5.02E-32 | 0.03 | 3233 |
| rs117744081 | G | A | 0.65752 | 0.03 | 1.62E-21 | 0.07 | 1143 |
| rs12482396 | T | A | 0.350657 | 0.22 | 8.12E-29 | 0.03 | 1950 |
| rs13076312 | T | C | 0.277632 | 0.46 | 4.63E-22 | 0.03 | 1762 |
| rs13136820 | C | T | 0.198851 | 0.33 | 1.72E-11 | 0.03 | 788 |
| rs159960 | A | G | 0.207014 | 0.48 | 8.08E-13 | 0.03 | 968 |
| rs1635168 | A | C | 0.357674 | 0.07 | 6.97E-13 | 0.05 | 750 |
| rs16843742 | C | T | -0.21072 | 0.23 | 6.11E-09 | 0.04 | 707 |
| rs1689510 | C | G | 0.270027 | 0.33 | 5.68E-20 | 0.03 | 1475 |
| rs2037184 | C | T | -0.17435 | 0.43 | 4.24E-09 | 0.03 | 670 |
| rs2082481 | A | G | -0.21072 | 0.24 | 3.27E-09 | 0.03 | 729 |
| rs2247314 | C | T | -0.23572 | 0.33 | 1.30E-13 | 0.03 | 1115 |
| rs229527 | A | C | 0.29267 | 0.43 | 1.40E-24 | 0.03 | 1940 |
| rs28735049 | A | T | 0.19062 | 0.26 | 7.45E-10 | 0.03 | 628 |
| rs3096860 | C | T | 0.173953 | 0.32 | 1.02E-08 | 0.03 | 591 |
| rs3814231 | T | C | -0.18633 | 0.26 | 1.71E-08 | 0.03 | 599 |
| rs4268748 | C | T | -0.31471 | 0.27 | 1.23E-20 | 0.03 | 1798 |
| rs4807000 | A | G | 0.173953 | 0.39 | 1.58E-09 | 0.03 | 647 |
| rs57874285 | A | C | 0.157004 | 0.4 | 4.56E-08 | 0.03 | 530 |
| rs6059655 | A | G | -0.46204 | 0.08 | 3.58E-13 | 0.06 | 1436 |
| rs644515 | A | G | 0.173953 | 0.41 | 1.15E-09 | 0.03 | 658 |
| rs7007905 | G | C | -0.18633 | 0.29 | 7.28E-09 | 0.03 | 642 |
| rs7893324 | C | T | -0.23572 | 0.14 | 4.61E-08 | 0.04 | 600 |
| rs8192917 | C | T | 0.207014 | 0.24 | 1.37E-10 | 0.03 | 703 |
| rs9309267 | T | C | 0.392042 | 0.05 | 5.46E-13 | 0.05 | 656 |
| rs9538 | T | G | -0.26136 | 0.22 | 7.81E-13 | 0.04 | 1063 |
